# Supplementary material
Source: PubMed Central journal article supplement (PMC5004636)

## **Supplemental Figure Legends**

**Supplemental Figure 1. Quality control of recombinant CFHR5 proteins by Western Blot.** Recombinant CFHR5 proteins were separated by SDS-PAGE and transferred to a membrane, the recombinant protein can be detected by anti-6X His tag antibody (a) and polyclonal anti-CFHR5 antibody (b) to form a band at about 63 kDa (CFHR5-WT, CFHR5-M, CFHR5-D, CFHR5-S) and 28 kDa (CFHR5-Short).

**Supplemental Figure 2. C3b binding capacity assay of different allotypes of CFHR5 proteins with respect to different C3b concentration.** The linearity range for C3b binding capacity of 1 $\mu$ g/mL CFHR5 was 1-4  $\mu$ g/mL. Among this range, CFHR5-M (c.508G>A/p.Val170Met), CFHR5-S (c.533A>G/p.Asn178Ser) and CFHR5-D (c.822A>T/p.Glu274Asp) showed consistent higher binding capacity to C3b, while CFHR5-Short (c.776T>A/p.Leu259Ter) had lower C3b binding capacity, compared to CFHR5-WT protein.

# Supplemental Figure 1.

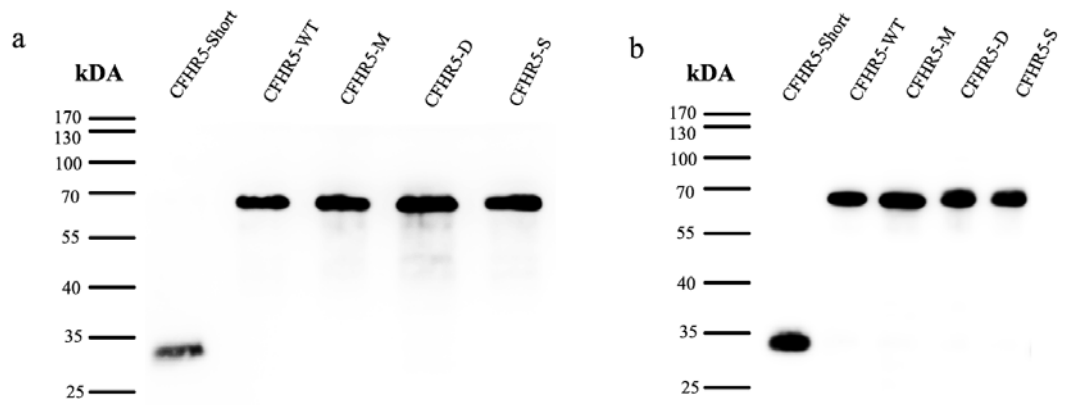

Supplemental Figure 2.

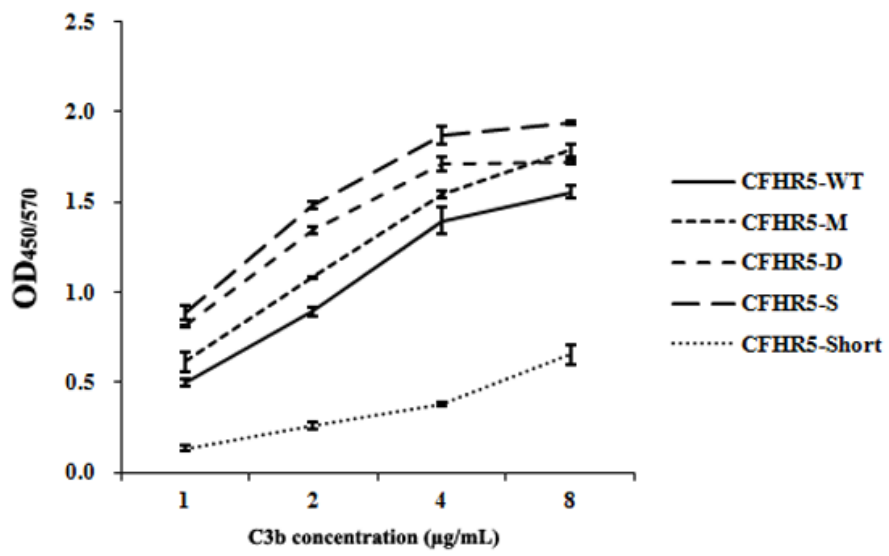

Supplement: ASN.2015010012SupplementaryData.pdf [file ASN.2015010012SupplementaryData.pdf]
